# Supplementary material
Source: PubMed Central journal article supplement (PMC8178179)
Supplement: NIHMS1669159-supplement-1.pdf [file NIHMS1669159-supplement-1.pdf]

## **Supplementary Material**

**Clinical and biological subtypes of B-cell lymphoma revealed by microenvironmental signatures.**

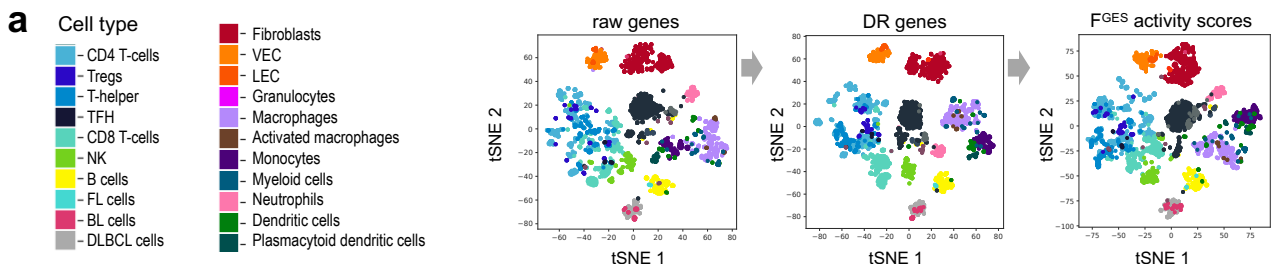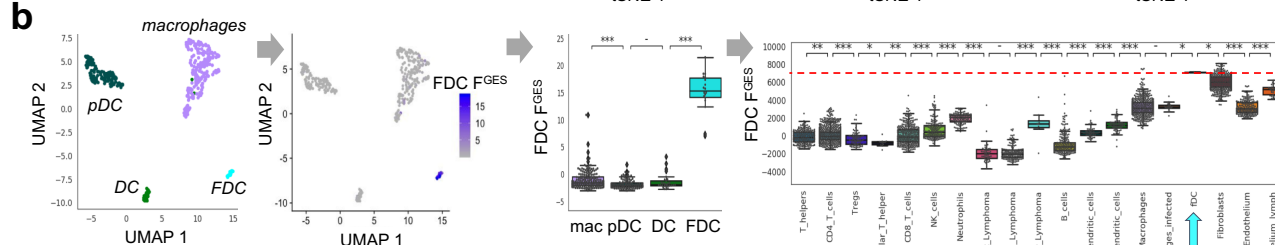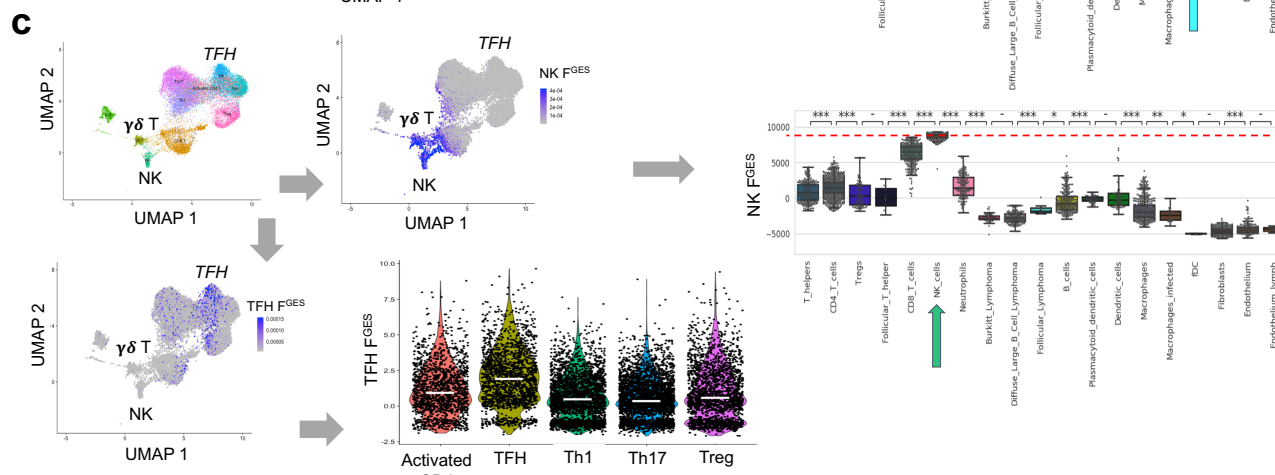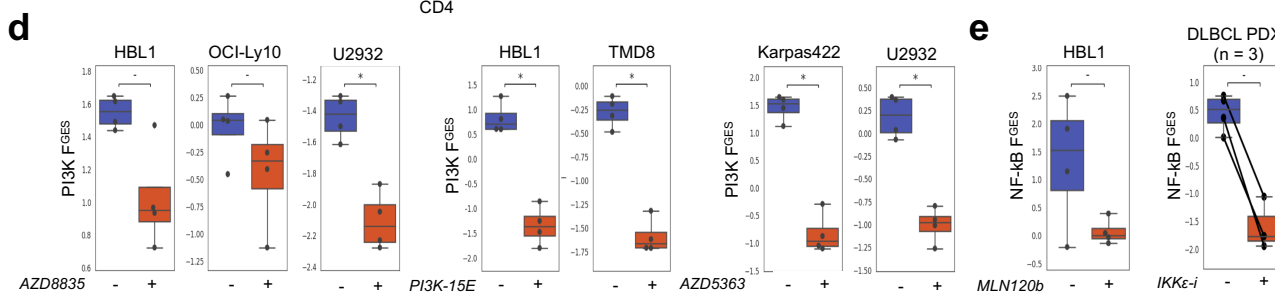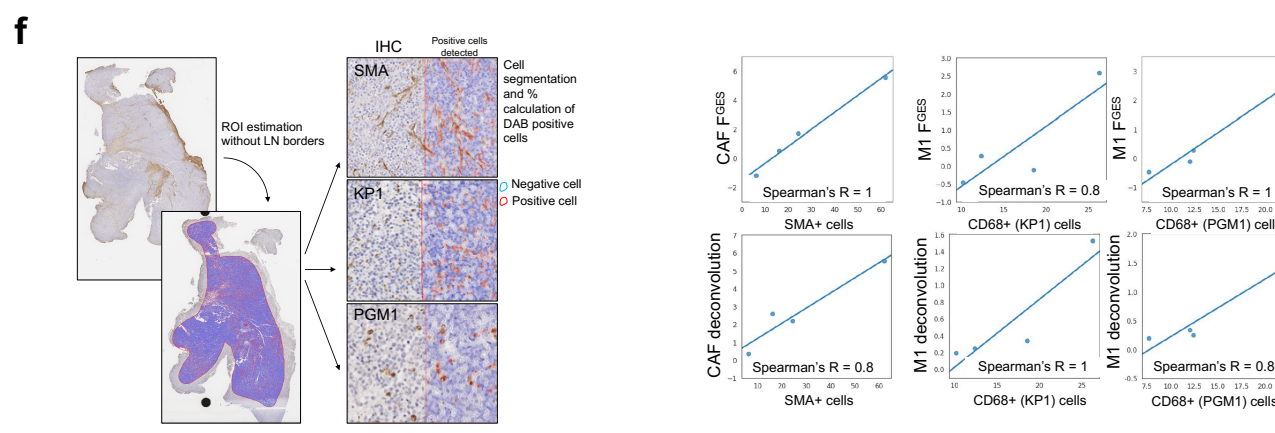

**Figure S1. a:** t-SNE projections of 5,069 RNA-sequencing profiles of different cell types representing progressive steps in data reduction dimensionality analysis from raw genes to  $F^{GES}$  activity scores. Different colors represent unique cell types. **b:** Follicular dendritic cells (FDC)  $F^{GES}$  validation in single cell RNA-seq profiles of macrophages, plasmacytic dendritic cells (pDC), dendritic cells (DC) and FDCs from (<https://www.biorxiv.org/content/10.1101/2020.04.28.054775v2>). FDC  $F^{GES}$  expression in RNA-seq from isolated lymphoma and LME cell subtypes. Arrow shows FDCs. **c:** Natural killer (NK) and follicular helper T cells (FHT)  $F^{GES}$  validation in single cell RNA-seq profiles of FHT, NK, gamma-delta T cells, activated CD4 cells, Th1, Th17 and Tregs from(1). NK  $F^{GES}$  expression in RNA-seq from isolated lymphoma and LME cell subtypes. Arrow shows NKs. (bottom) TFH  $F^{GES}$  expression in a panel of single cell RNA-seq T cells. **d-e:** PI3K and NF-kB  $F^{GES}$  validation in RNA-seq from ABC-DLBCL cells lines treated with PI3K and AKT inhibitors(2,3) (d) and HBL1 treated with IKKb inhibitor MLN120b(2) and 3 matched DLBCL PDX treated with IKK $\epsilon$ /TBK1 inhibitor(4) (e). Data from datasets GSE92619, GSE94610 and GSE121159. **f:** example of immunohistochemistry (IHC) quantification (cell segmentation and calculation of positive cells) from anti-SMA and two anti-CD68 antibodies in DLBCL tissue. Spearman's correlation of  $F^{GES}$  for CAF and M1 macrophages (top) and deconvolution for CAF and M1 macrophages (bottom) with their respective cell quantification from IHC in 5 DLBCL cases. \* $p < 0.05$ , \*\* $p < 0.01$ , \*\*\* $p < 0.001$ .

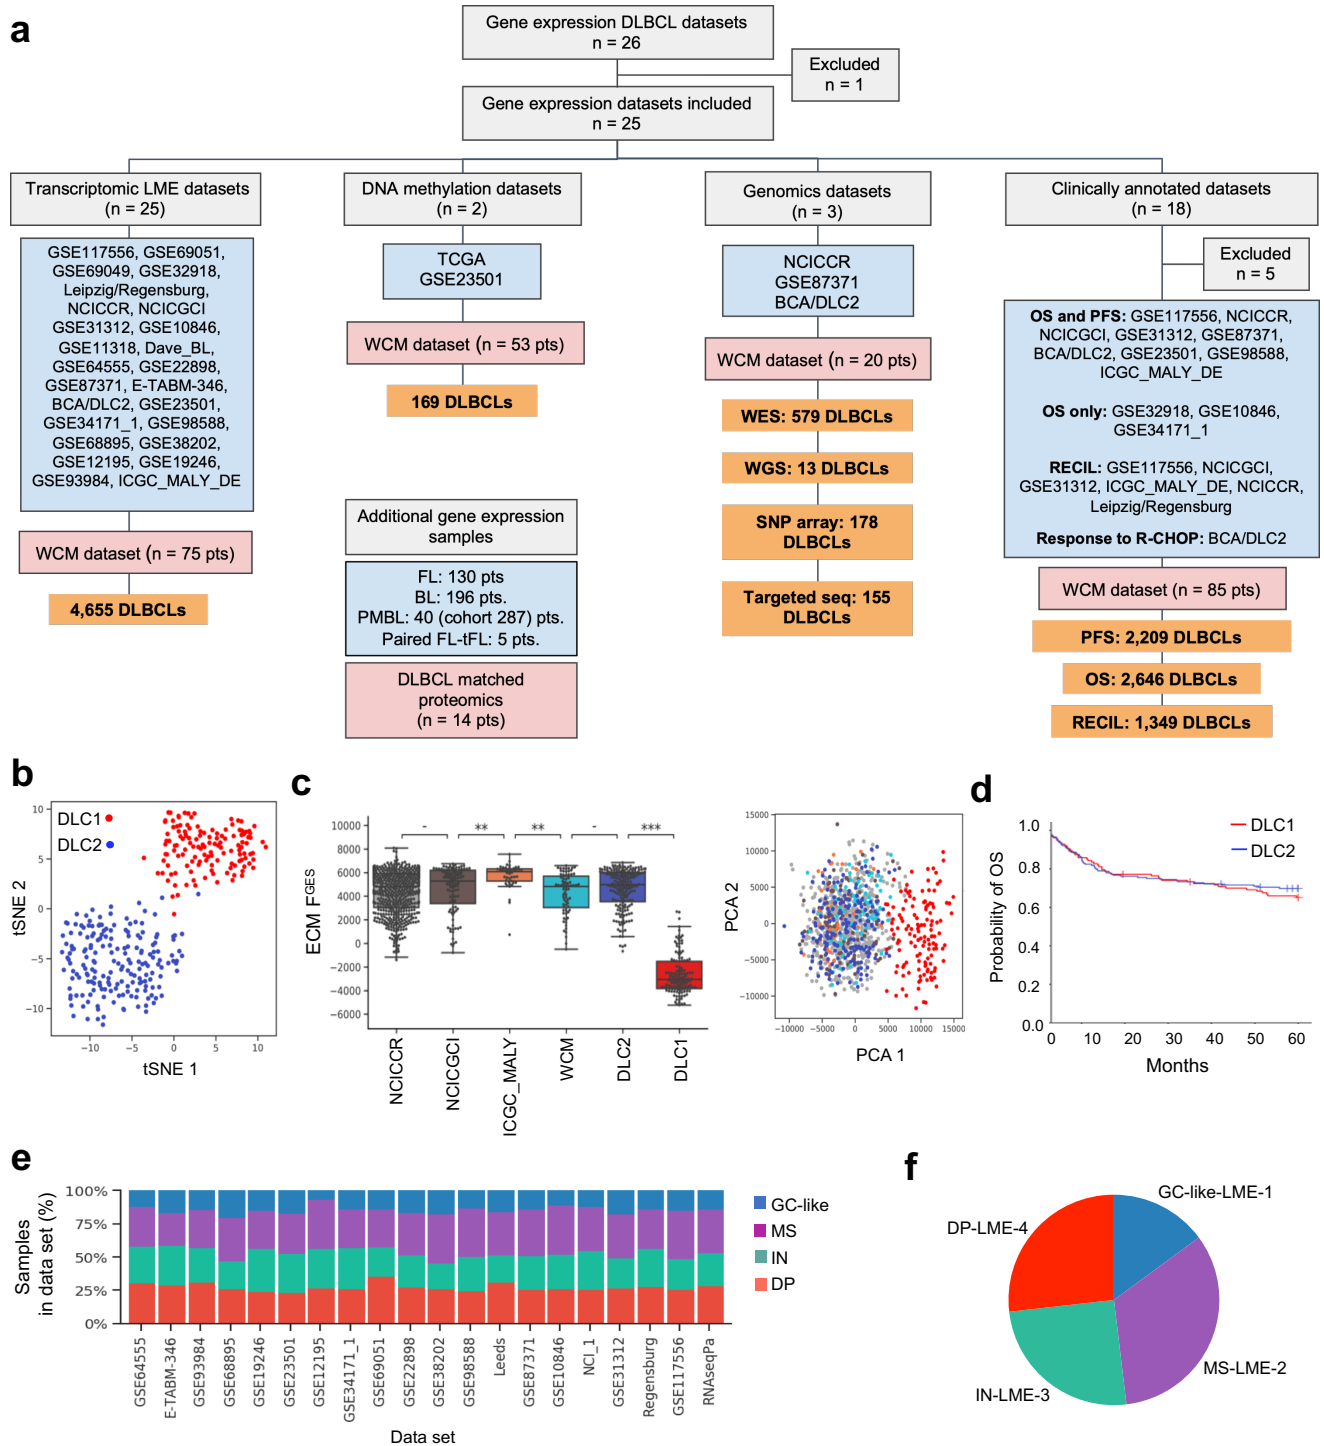

**Figure S2. a.** Flowchart of datasets included in the study. Part of one dataset (DCL1) was excluded because contained isolated lymphoma cells, another dataset with mutations was excluded due to low number of cases analyses and 5 clinically annotated datasets were excluded since they OS/PFS curves were not representative of an unselected DLBCL population. **b:** tSNE projection in the  $F^{GES}$  space of the

sample excluded (DCL1) vs. samples containing microenvironment cells (DCL2) from the same dataset. **c:** DCL1 samples had significantly lower  $F^{\text{GES}}$  ECM signature and were outliers on the PCA projection in  $F^{\text{GES}}$  space. **d.** Kaplan-Meier curves for OS of DCL1 (excluded) vs. DCL2 (included) datasets. **e:** LME distribution per compiled datasets showing individual dataset contribution to LME characterization. **f:** LME distribution in all the samples analyzed (n = 4,655)

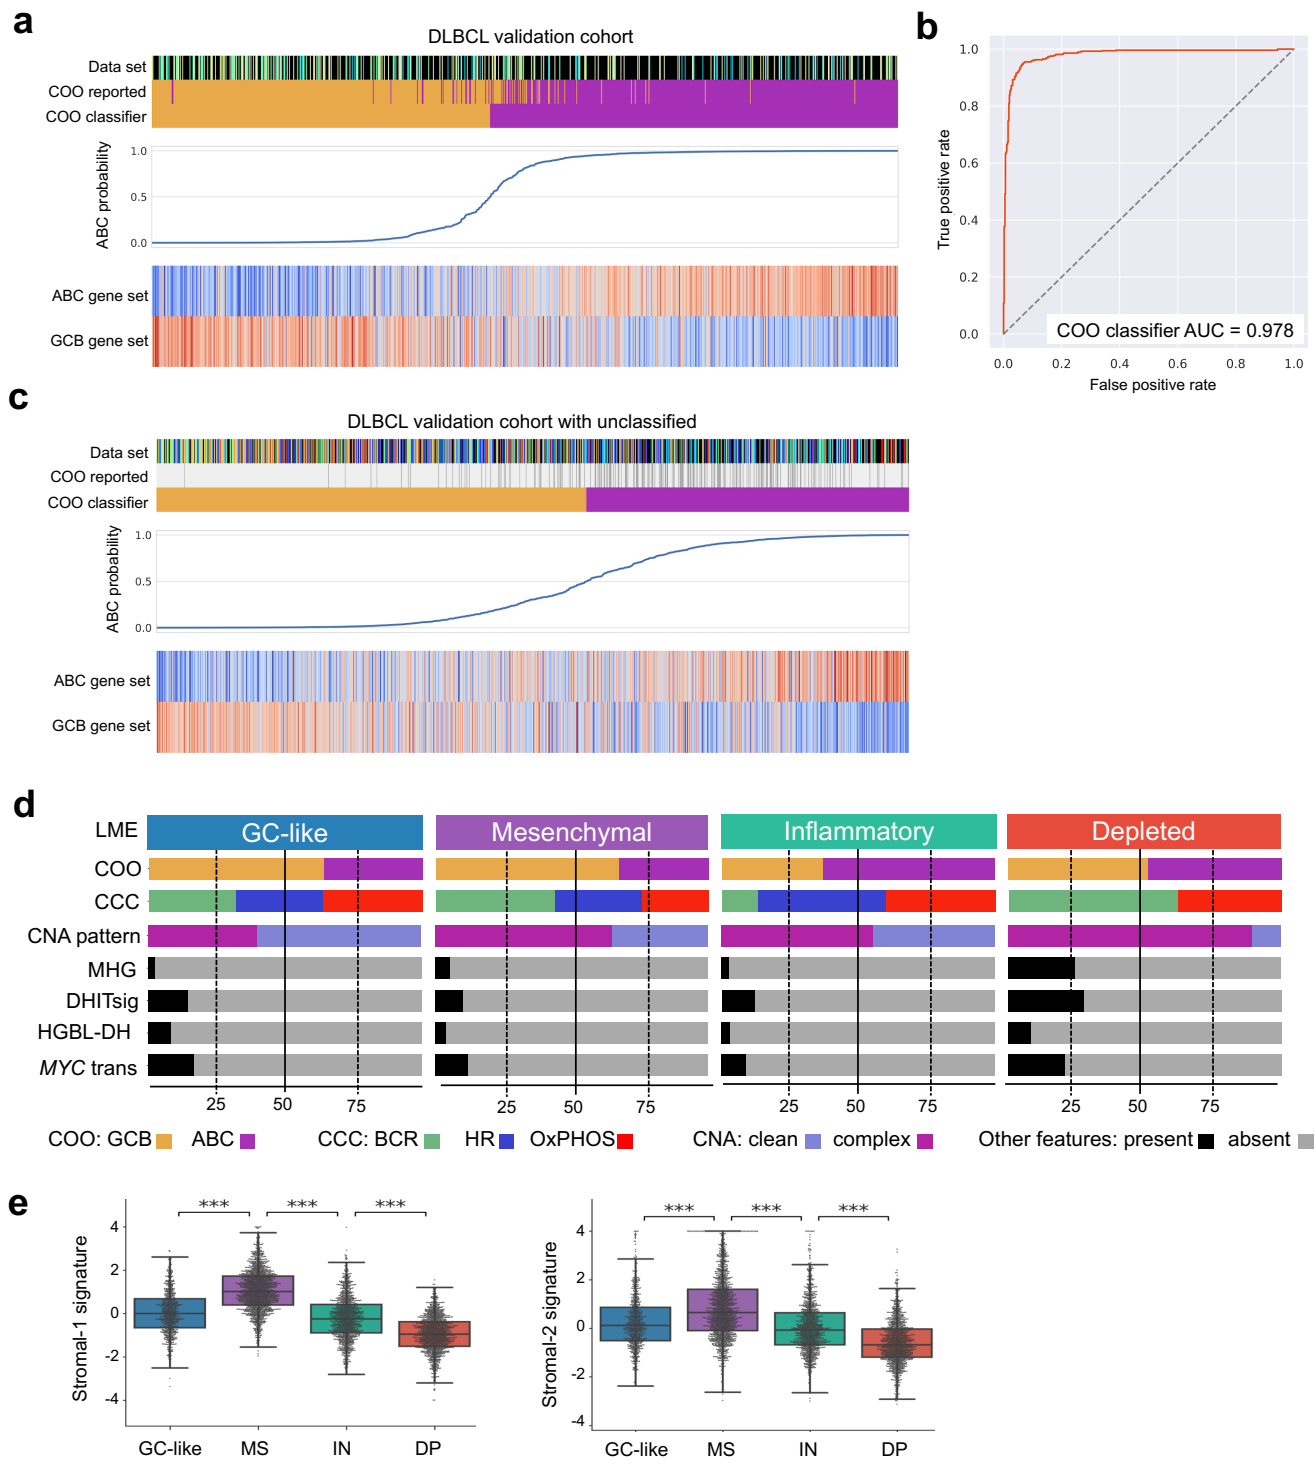

**Figure S3. a:** *Top:* COO classifier performance on the validation dataset comparing reported vs. predicted COO class. *Middle:* ABC-DLBCL probability. *Bottom:* ABC- and GCB-DLBCL signatures as reported. **b:** ROC curves comparing reported vs. classified. **c:** COO classifier performance in the full cohort using samples with previously reported (gray lines) and unknown (white lines) COO status. ABC-

DLBCL probability and ABC- and GCB-DLBCL signatures. **d**: Distribution of COO, CCC, CNA pattern, MHG, DHITsig, HGBL-DH and MYC translocation categories across LME subtypes. **e**: Distribution of stromal-1 and stromal-2 gene expression signatures according to LME subtype.

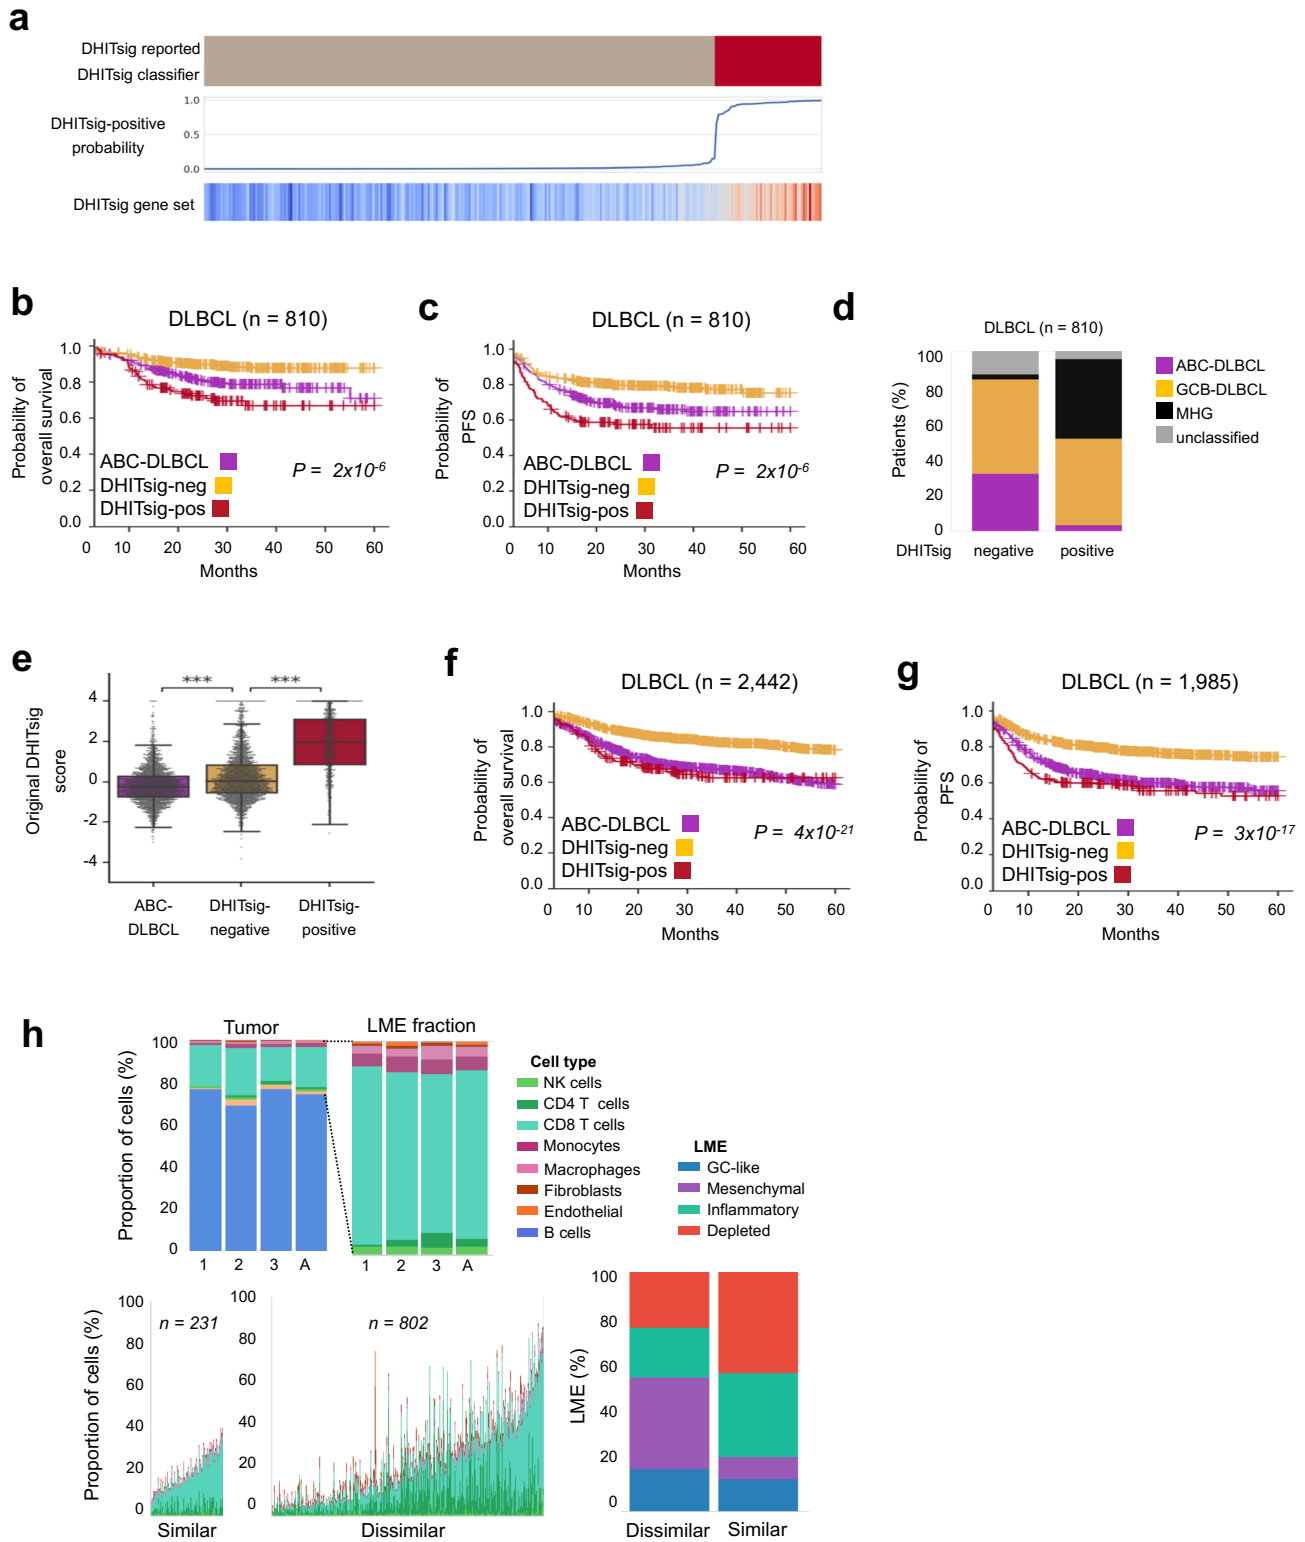

**Figure S4. a: Top:** DHITsig classifier performance on the validation dataset comparing reported vs. predicted DHITsig (red present, gray absent) in GCB-DLBCLs. **Middle:** DHIT-sig-positive probability.



*Bottom:* DHITsig signature as reported. **b-c:** Five-year OS and PFS curves for the GSE117556 DLBCL cohort (n = 810). **d:** overlap between several classifications showing the distribution of COO subtypes (ABC and GCB) and MHG DLBCLs into DHITsig negative vs. positive cases. UNC: unclassified. **e:** DHITsig score in the complete DLBCL cohort. **f-g:** Five-year OS and PFS curves for the full cohort (n = 2,442 and 1,985 cases, respectively). **h:** Characterization of the LME in the *myc + bcl2* expressing genetically engineered mice B-cell lymphoma model by the LME similarity score. LME human DLBCLs with the highest 20% of similarity score (n = 231) to *myc + bcl2* expressing LME showed enrichment of DP-LME (41%).

**a**

|       |   |
|-------|---|
| LME-2 | N |
| LME-1 | N |
| LME-4 | N |
| LME-3 | N |
| LME-3 | N |
| LME-4 | N |
| LME-3 | Y |
| LME-2 | Y |
| LME-2 | Y |
| LME-4 | Y |
| LME-4 | Y |
| LME-1 | N |
| LME-4 | N |
| LME-4 | Y |
| LME-2 | N |
| LME-4 | N |
| LME-3 | Y |
| LME-4 | Y |
| LME-4 | Y |
| LME-2 | Y |
| LME-4 | Y |
| LME-4 | Y |
| LME-2 | Y |
| LME-2 | Y |
| LME-1 | Y |
| LME-1 | Y |
| LME-4 | Y |
| LME-4 | Y |
| LME-2 | Y |
| LME-2 | Y |
| LME-2 | Y |

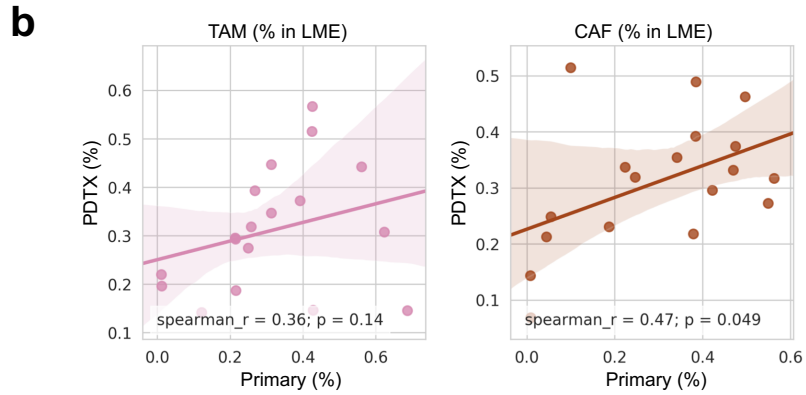

**Figure S5. a:** LME categories (by cell deconvolution) between primary DLBCL and their matched PDTXs. Conserved LME categories are indicated as “Y”. **b:** Spearman correlation between proportion of TAM and CAF in the primary sample (X-axis) and the matched PDTX sample (Y-axis).

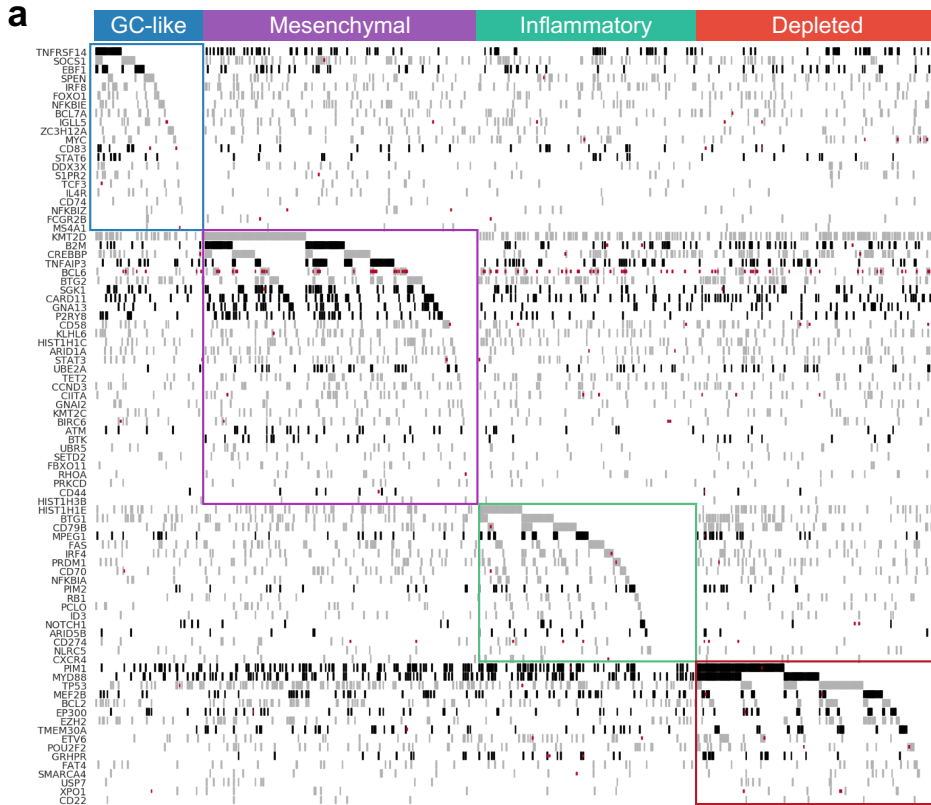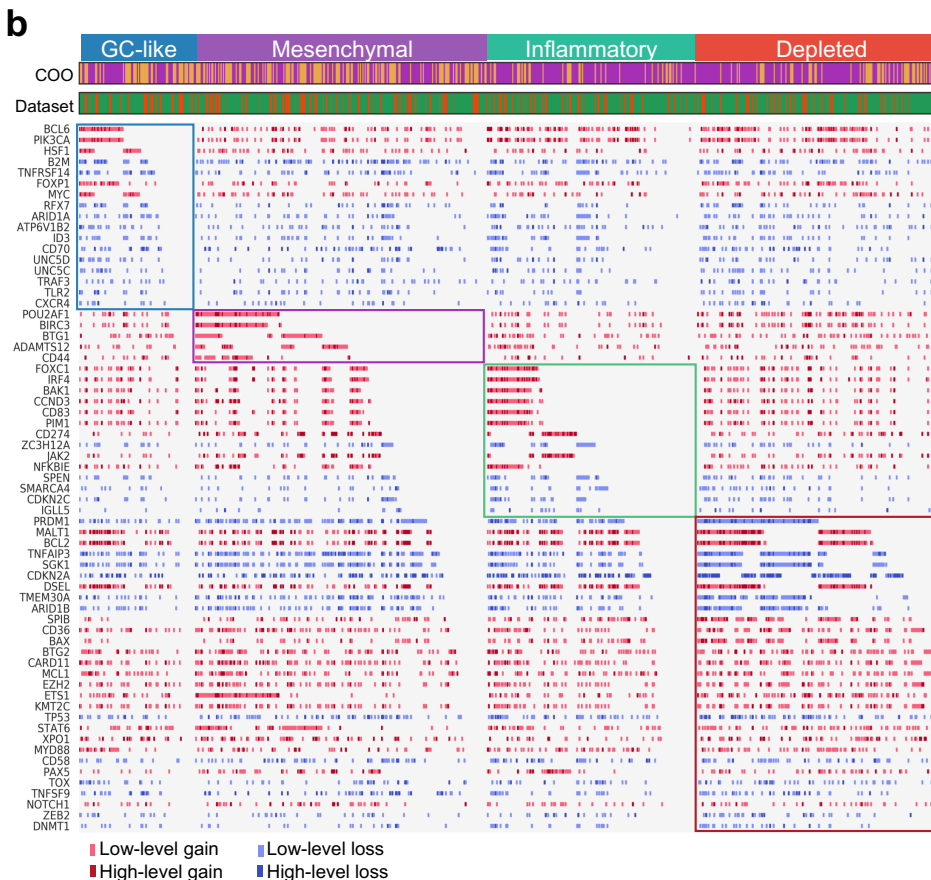

**Figure S6. a:** Mutation plot for the most common mutated genes in lymphoma according to the LME subtypes. Mutations are grouped into LME subtypes according to their prevalence. Mutations with significant enrichment (q-value < 0.1) in a particular LME subtype are in black. Gene translocations are in red. **b:** CNA plot for the 65 most frequently altered genes in lymphoma according to the LME subtypes. CNAs are grouped into LME subtypes according to their prevalence.

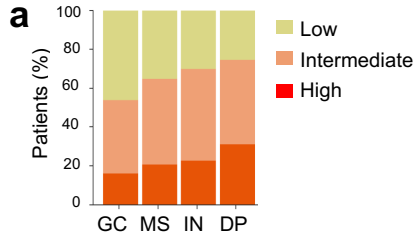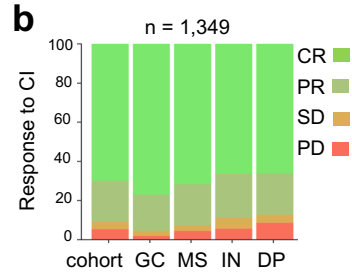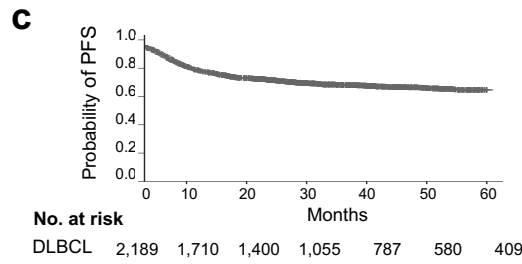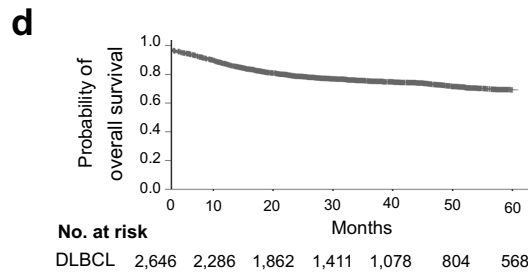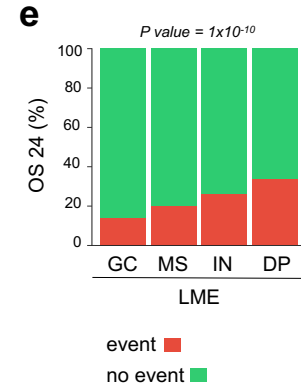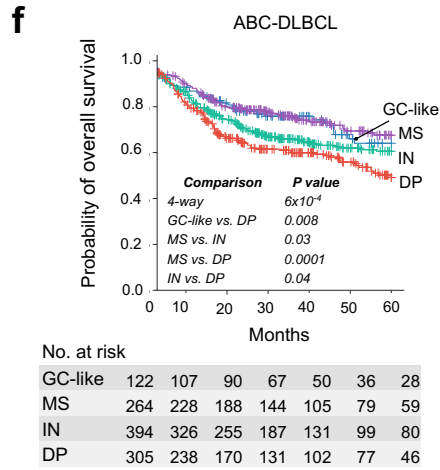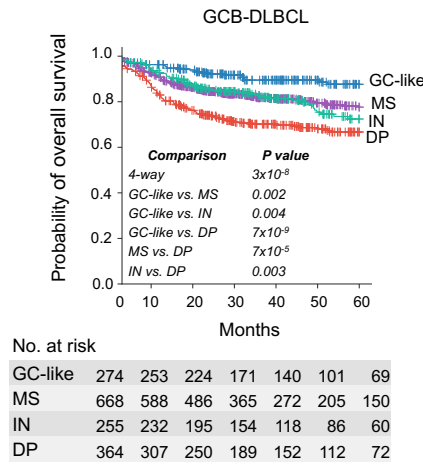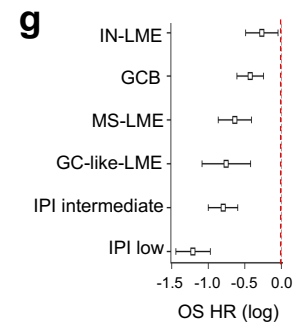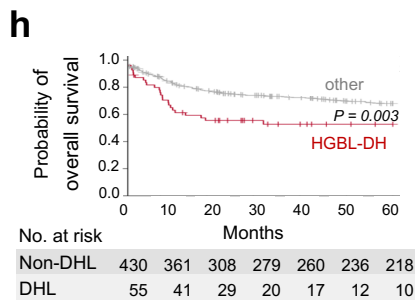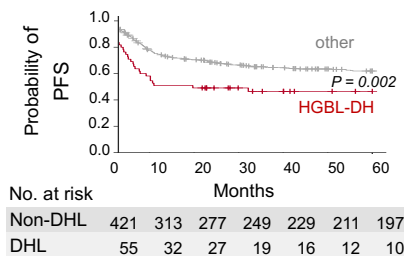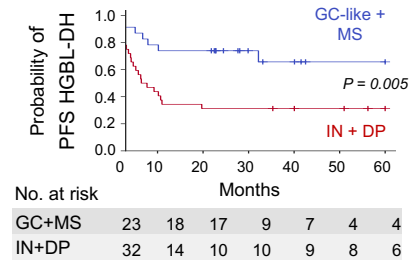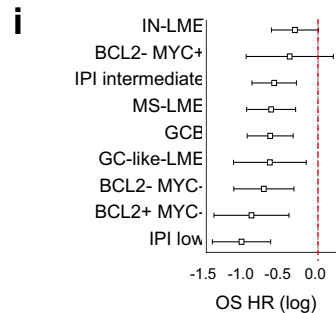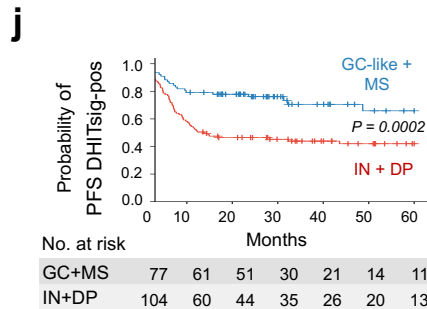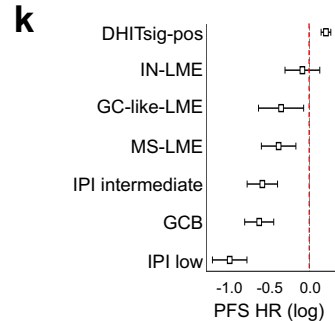

**Figure S7. a:** Distribution of IPI status (low: 0-1, intermediate: 2-3 and high: 4-5) according to the four LME subtypes. **b:** Outcome (RECIL criteria) to rituximab-containing chemoimmunotherapy (CI) regimens in an unselected cohort of 1,349 DLBCL patients according to their LME category. **c:** Five-year progression-free survival (PFS) curve for the DLBCL cohort of 2,189 patients used in our analyses. **d:** Five-year overall survival (OS) curve for the DLBCL cohort of 2,646 patients used in our analyses. **e:** OS at 24 months (OS24) in DLBCL patients according to the LME category. Censored patients are not shown. **f:** Kaplan-Meier models of OS according to LME subtype in ABC- and GCB-DLBCLs. Only statistically significant comparisons shown. **g.** OS hazard ratio (HR) plots (log with 95% confidence interval) for LME category, COO subgroup and IPI. **h:** Kaplan-Meier models of OS and PFS for HGBL-DH vs. non-HGBL-DH and PFS for HGBL-DH segregated into favorable prognosis LMEs (GC-like and MS) vs. unfavorable prognosis LMEs (IN and DP). **i:** OS hazard ratio (HR) plots (log with 95% confidence interval, n = 486) for LME category, COO subgroup, IPI and BCL2 and MYC translocation status. **j:** Five-year PFS curves for DHITsig positive patients segregated into favorable prognosis LMEs (GC-like and MS) vs. unfavorable prognosis LMEs (IN and DP). **k.** PFS hazard ratio (HR) plots (log with 95% confidence interval, n = 2,024) for LME category, COO subgroup, IPI and DHITsig status.

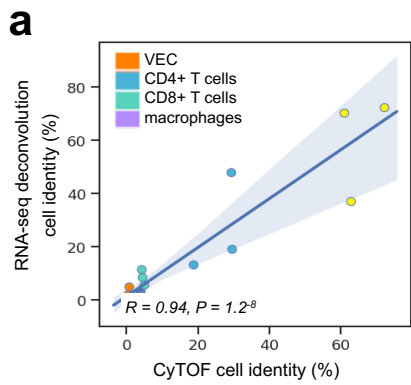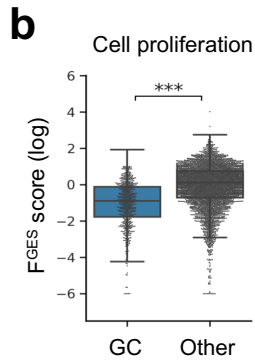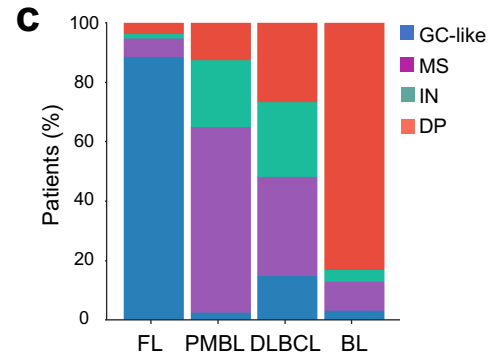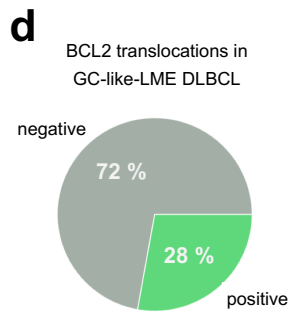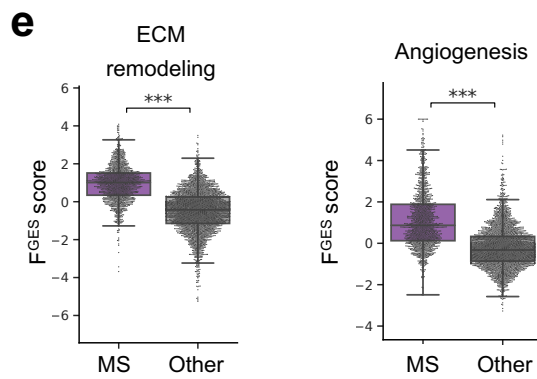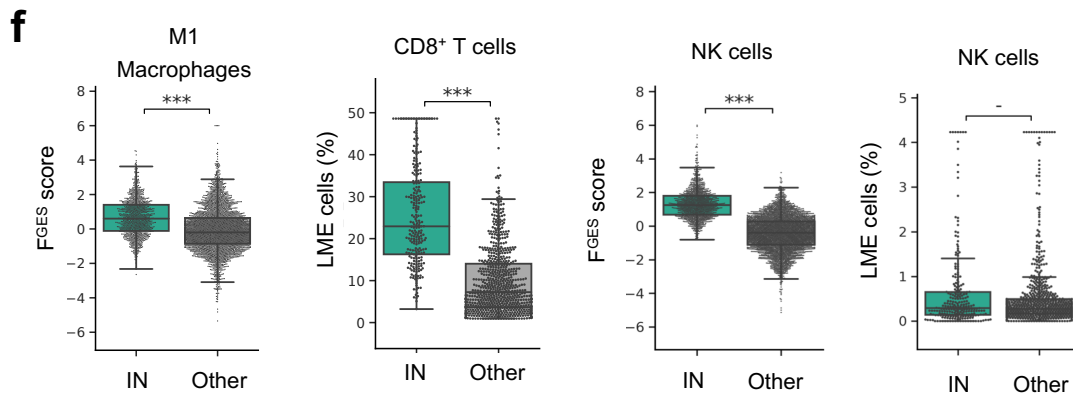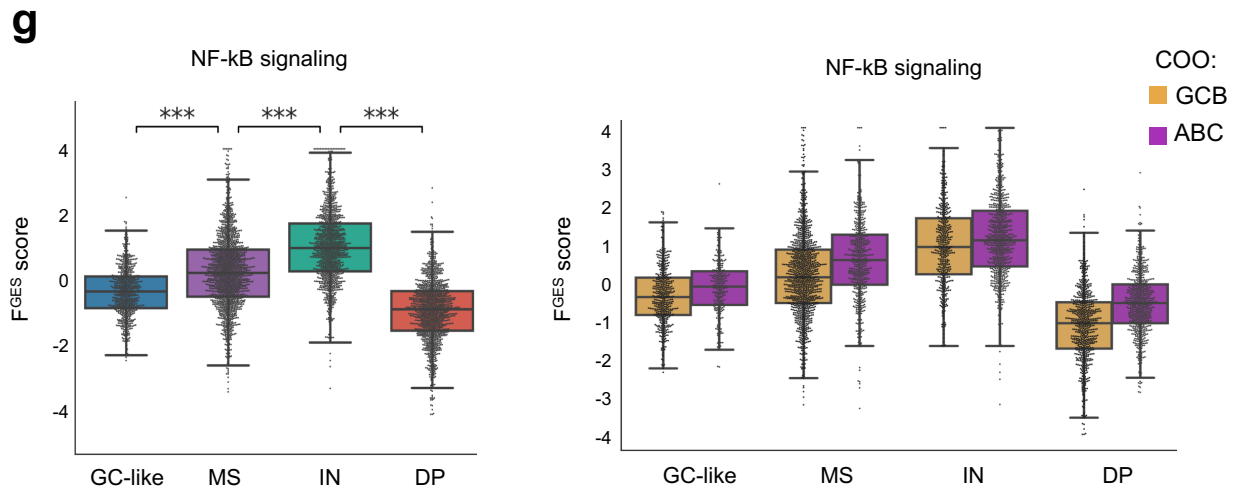

**Figure S8.** **a:** Comparison of cell identities and proportions between CyTOF and deconvolution algorithms in tonsil samples. **b:**  $F^{GES}$  for cell proliferation in GC-like-LME DLBCLs vs. other LMEs. **c:** DLBCL LME distribution according to B-cell lymphoma subtypes follicular lymphoma (FL), primary mediastinal B-cell lymphoma (PMBL) and Burkitt lymphoma (BL). **d:** BCL2 translocations in GC-like-LME DLBCL patients. **e:**  $F^{GES}$  for ECM remodeling and angiogenesis in MS-LME DLBCLs vs. other LMEs. **f:** Proportion of LME cells significantly enriched in the IS-LME subtype obtained by cell deconvolution algorithms or  $F^{GES}$ . **g:** NF- $\kappa$ B  $F^{GES}$  in DLBCL samples according to LME and to LME by COO. \*\*\* $p < 0.001$ .



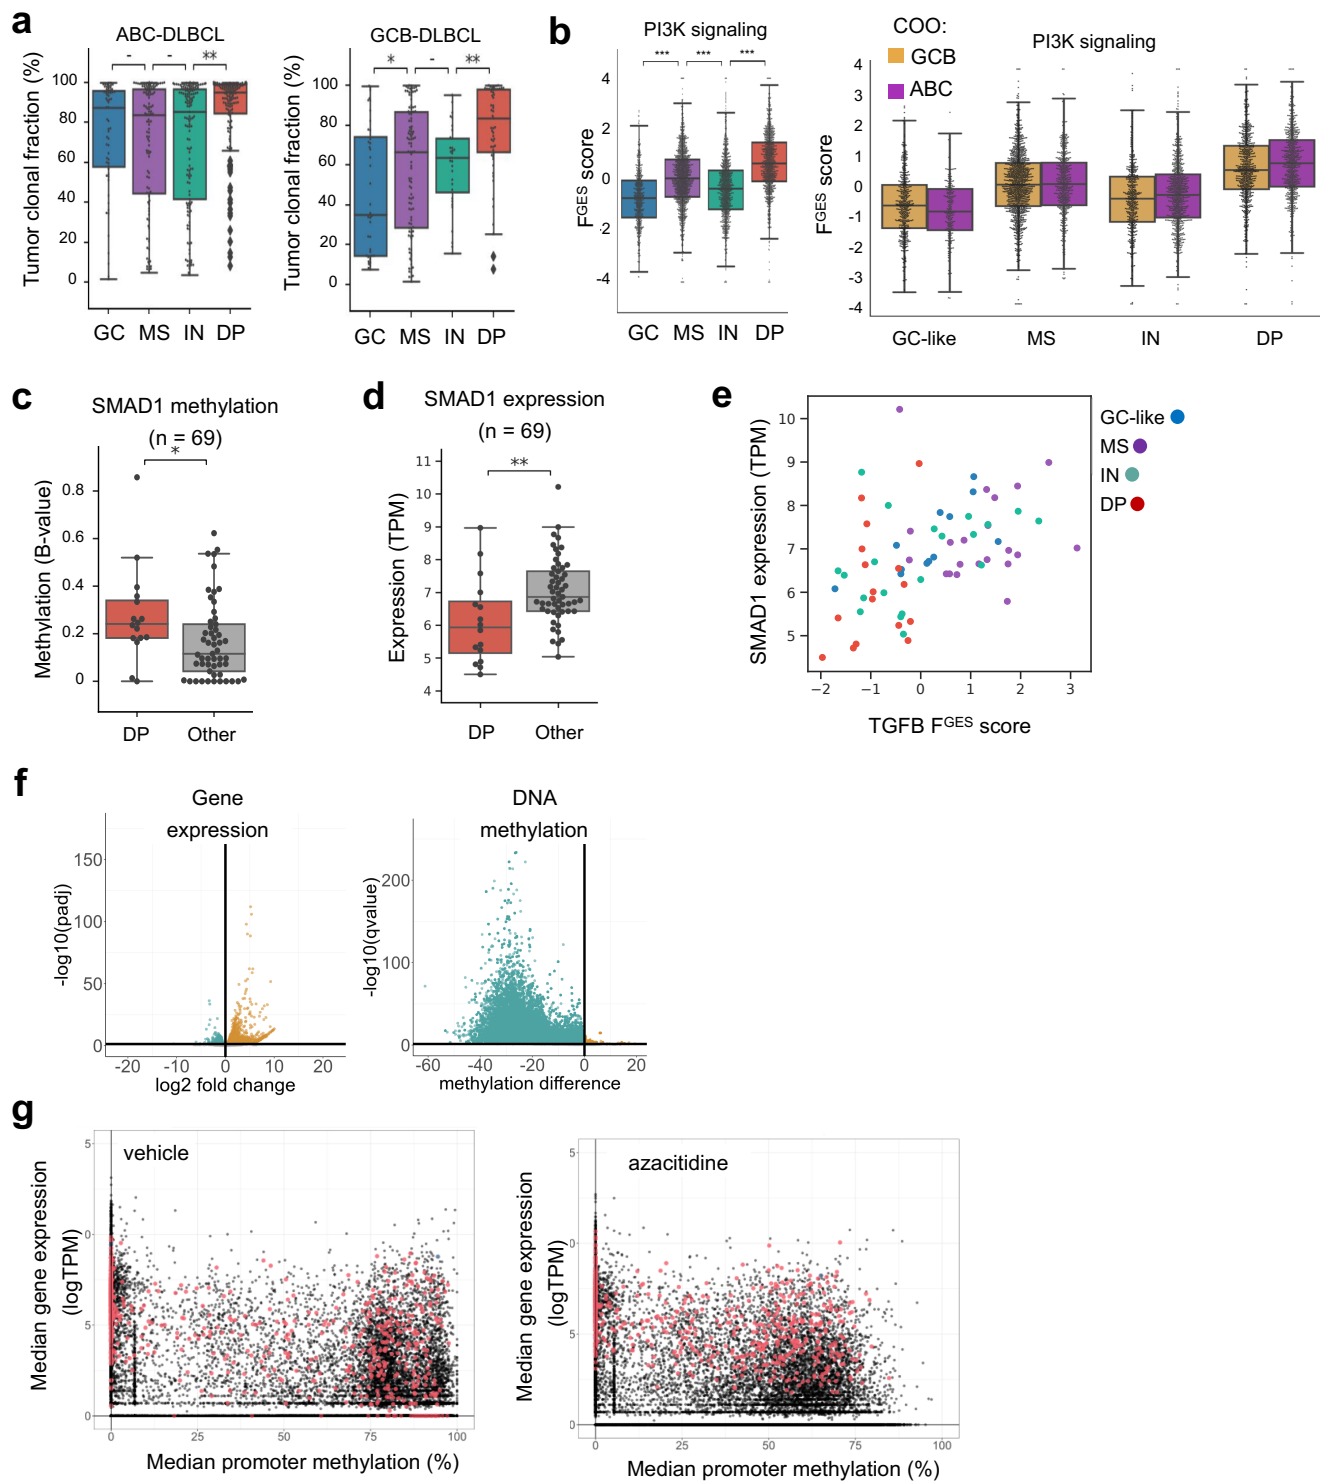

**Figure S9. a:** Tumor clonal fraction determined by IGH clonality in ABC- and GCB-DLBCL distributed by LME. **b:** PI3K F<sup>GES</sup> in DLBCL samples according to LME and to LME by COO. **c-d:** SMAD1 promoter methylation (B-value) and SMAD1 expression in 69 DLBCL samples. **e:** scatter plot between SMAD1 expression and TGFβ pathway activity in 69 DLBCL samples according to their LME subtype. **f:** *Left:*

volcano plot of differential gene expression. Upregulated and downregulated genes with values of p-adjusted < 0.05 upon azacitidine treatment are shown in orange and green, respectively. Gray dots represent non-significant genes according to the selected p-adjusted value threshold. *Right:* volcano plot of differential promoter region methylation. Increased and decreased promoter methylation with p-adjusted < 0.05 upon azacitidine treatment are shown in orange and green, respectively. Gray dots represent non-significant regions according to the selected threshold. **g:** Scatter plot representing the median promoter methylation and median gene expression per gene for vehicle-treated samples (left) and azacitidine treated samples (right). Genes that show both significant gene expression changes (padj< 0.05) and significant differences in promoter region methylation (q-value <0.05, absolute methylation difference > 10) are depicted in red. \* $p < 0.05$ , \*\* $p < 0.01$ , \*\*\* $p < 0.001$

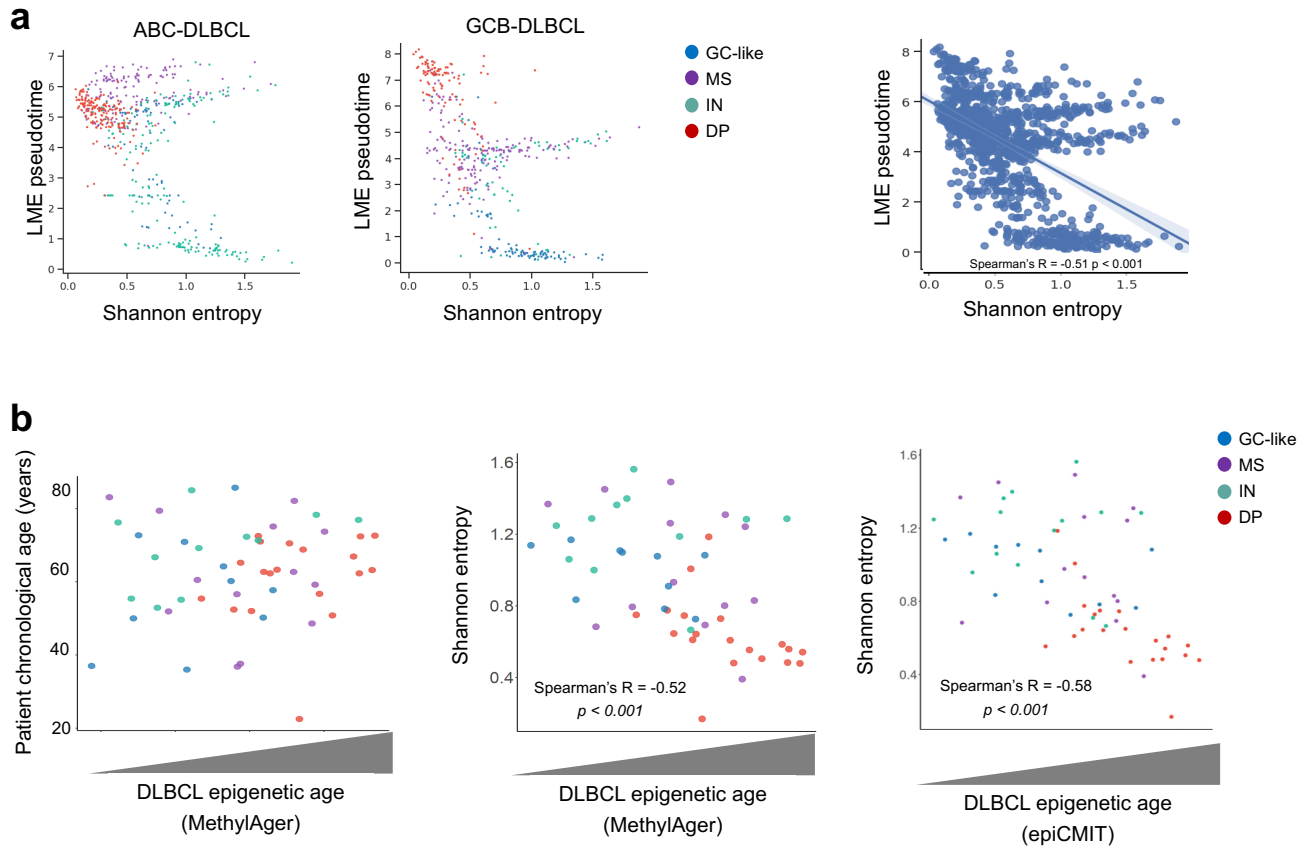

**Figure S10. a:** Correlation between LME pseudotime (Y-axis) and LME Shannon entropy (X-axis) in ABC- and GCB-DLBCLs. LME cluster indicated by colors. Correlation line and statistics for all the samples. **b:** Correlation between the chronological age of the patient (Y-axis) and the epigenetic age of the lymphoma (X-axis) measured using MethylAger scoring. Correlations between LME Shannon entropy (Y-axis) and the epigenetic age of the lymphoma (X-axis) measured using MethylAger and epiCMT methods.

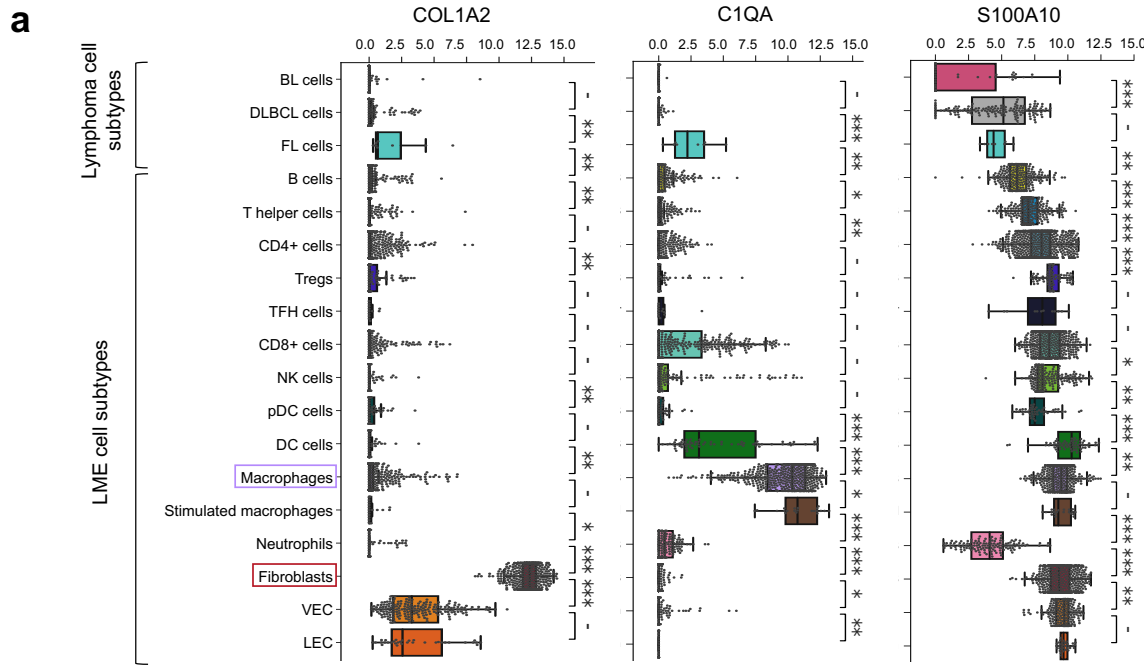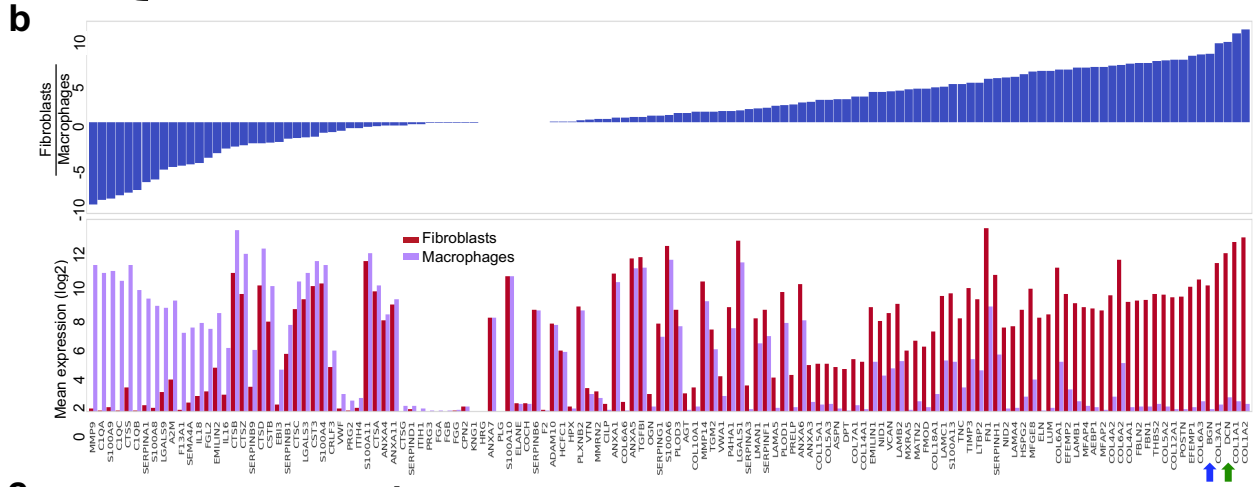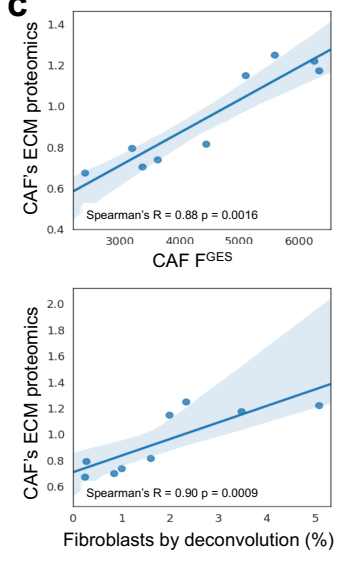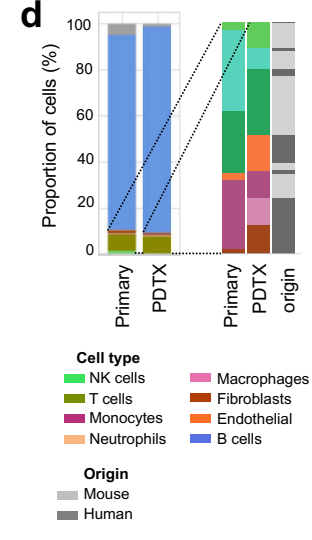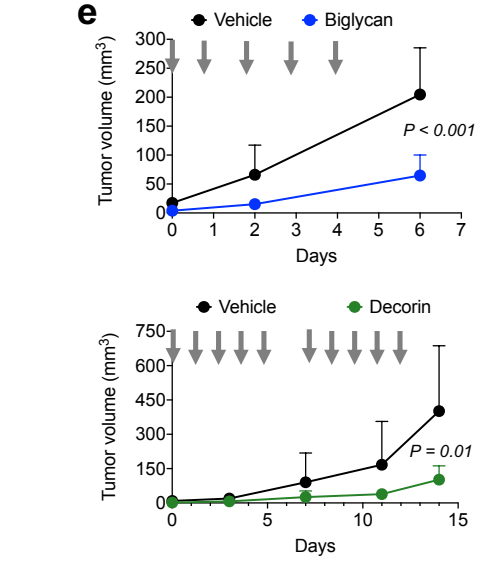

**Figure S11. a:** Median gene expression of selected matrisome genes *COL1A2*, *C1QA* and *S100A10* in lymphoma and LME cellular subtypes. **b:** Ranking of transcripts from matrisome coding proteins according to the association with fibroblasts (red) or macrophages (purple). Ratio between fibroblasts and macrophages (top). Relative abundance of the transcript for each of these cell types (bottom). The arrows indicate the position of decorin (DCN) and biglycan (BGN). **c:** Spearman's correlation between the abundance of the 10 top proteins associated with CAFs (Y-axis) and the CAF FGES (top) and proportion of fibroblasts by signature deconvolution (bottom) in 9 DLBCL samples. **d:** Cellular composition by transcript deconvolution of primary DLBCL LME-DP and its PDTX2 model. Expansion of the LME cellular composition in the primary and PDTX2 model and indication whether these cells in PDTX2 are of human or mouse origin. **e.** DLBCL growth curve of DLBCL LME-DP PDTX2 treated with vehicle vs. BGN (top) or vehicle vs. DCN (bottom). Drugs were administered in the days indicated by arrows starting 10 days after tumor implantation (day 0). \* $p < 0.05$ , \*\* $p < 0.01$ , \*\*\* $p < 0.001$ .

## Supplementary Tables

Table S1. Gene sets of F<sup>GES</sup>

Table S2. COO classifier features

Table S3. DHITsig classifier features

Table S4. Prevalence of mutations across LME categories

Table S5. Prevalence of CNAs across LME categories

Table S6. Upregulated and hypomethylated genes in murine A20 lymphomas upon azacitidine treatment and pathway analysis.

Table S7. DLBCL matrisome

## References

1. James KR, Gomes T, Elmentaite R, Kumar N, Gulliver EL, King HW, *et al.* Distinct microbial and immune niches of the human colon. *Nat Immunol* **2020**;21(3):343-53 doi 10.1038/s41590-020-0602-z.
2. Erdmann T, Klener P, Lynch JT, Grau M, Vockova P, Molinsky J, *et al.* Sensitivity to PI3K and AKT inhibitors is mediated by divergent molecular mechanisms in subtypes of DLBCL. *Blood* **2017**;130(3):310-22 doi 10.1182/blood-2016-12-758599.
3. Kloo B, Nagel D, Pfeifer M, Grau M, Duwel M, Vincendeau M, *et al.* Critical role of PI3K signaling for NF-kappaB-dependent survival in a subset of activated B-cell-like diffuse large B-cell lymphoma cells. *Proc Natl Acad Sci U S A* **2011**;108(1):272-7 doi 10.1073/pnas.1008969108.
4. Carr M, Mamand S, Chapman KL, Perrior T, Wagner SD. IKKepsilon and TBK1 in diffuse large B-cell lymphoma: A possible mechanism of action of an IKKepsilon/TBK1 inhibitor to repress NF-kappaB and IL-10 signalling. *J Cell Mol Med* **2020**;24(19):11573-82 doi 10.1111/jcmm.15774.
